# Supplementary material
Source: publisher figshare collection journal article supplement (https://gsapubs.figshare.com/articles/dataset/_/12863867)
Supplement: Supplementary file 1 [file 1]

## Supplement S7

### Additional Examples of Sedimentary Rock Fragments in the Outcrop at Cooperstown

#### Extraformational sediment recycling on Mars

Kenneth S. Edgett, Steven G. Banham, Kristen A. Bennett, Lauren A. Edgar, Christopher S. Edwards, Alberto G. Fairén, Christopher M. Fedo, Deirdra M. Fey, James B. Garvin, John P. Grotzinger, Sanjeev Gupta, Marie J. Henderson, Christopher H. House, Nicolas Mangold, Scott M. McLennan, Horton E. Newsom, Scott K. Rowland, Kirsten L. Siebach, Lucy Thompson, Scott J. VanBommel, Roger C. Wiens, Rebecca M. E. Williams, and R. Aileen Yingst

#### ADDITIONAL EXAMPLES OF SEDIMENTARY ROCK FRAGMENTS IN THE OUTCROP AT COOPERSTOWN

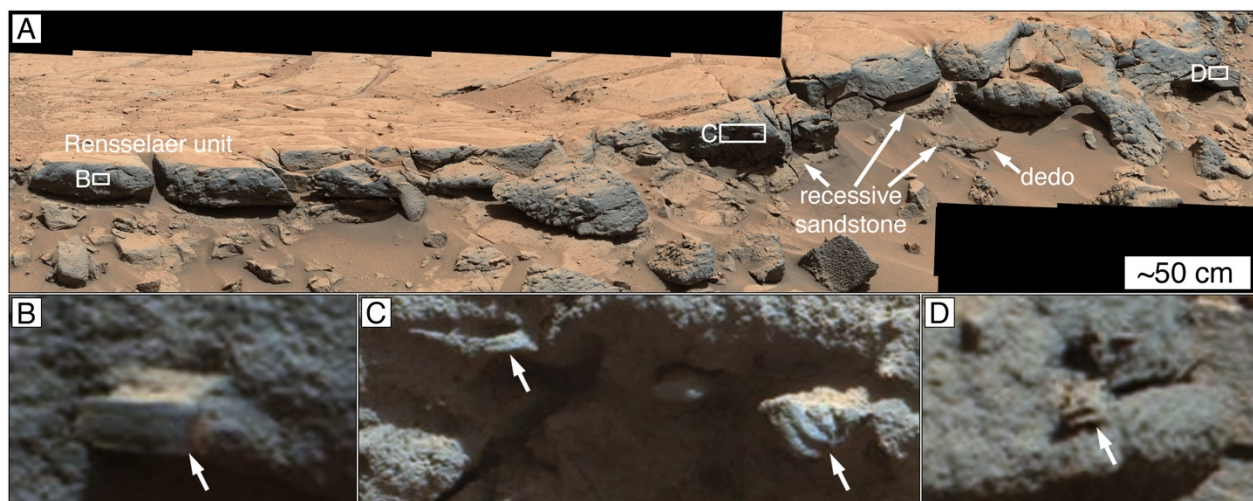

**Figure S7-1.** Additional examples of sedimentary rock fragments in the Rensselaer unit sandstone at Cooperstown. **(A)** Broad view of the Cooperstown outcrop, to the right (north) of the area shown in **Figure 11B (in main paper)**. A dedo (rock protrusion tipped by a pebble; cf. Laity, 2011) indicates the power of aeolian erosion, particularly of the underlying recessive sandstone. **(B)** Layered pebble in the dark gray Rensselaer unit. **(C)** Layered pebble, expressed as “stair steps” (right arrow). **(D)** Platy clast split laterally down its middle, perhaps an indicator of layering. Image identifiers: **(A)** Portion of Sol 440 Mastcam-100 (sequence mcam01795) mosaic. **(B–D)** Portions of Sol 440 Mastcam-100 (sequence mcam01795) mosaic.

**REFERENCES CITED IN THIS SUPPLEMENT**

Laity, J.E., 2011, Wind erosion in drylands, Chapter 21 *in* Thomas, D.S.G., ed., *Arid Zone Geomorphology: Process, Form and Change in Drylands* (3rd edition): West Sussex, UK, Wiley-Blackwell, p. 539–568, <https://doi.org/10.1002/9780470710777.ch21>.
